# Supplementary material for: Fire history in western Patagonia from paired tree-ring fire-scar and charcoal records
Source: Copernicus journal article supplement (doi:10.5194/cp-8-451-2012), 2012-03-09
Supplement: Supplementary file 1 [file cp-8-451-2012-supplement.pdf]

## Supplement

**Table S1: Sample site characteristics and summaries of tree-ring fire records**

| Watershed            | Site no. | Site code | Area (ha) | Elevation (m) | Lat (S) | Lon (W) | Period used for smoothing fire record |             |
|----------------------|----------|-----------|-----------|---------------|---------|---------|---------------------------------------|-------------|
|                      |          |           |           |               |         |         | All                                   | Widespread* |
| <b>Baker</b>         |          |           |           |               |         |         |                                       |             |
|                      | 1        | CAS       | 63        | 132           | 47°     | 72°     | 1676-2004                             | 1798-2004   |
|                      | 2        | VAR       | 16        | 28            | 47°     | 73°     | 1559-2004                             | 1755-2004   |
|                      | 3        | LAL       | 12        | 20            | 47°     | 73°     | 1673-2004                             | 1729-2004   |
|                      | 4        | CRU       | 15        | 23            | 47°     | 73°     | 1788-2004                             | 1825-2004   |
|                      | 5        | TOR       | 18        | 21            | 47°     | 73°     | 1709-2004                             | 1851-2004   |
| <b>Quetru-Pascua</b> |          |           |           |               |         |         |                                       |             |
|                      | 6        | ENT       | 103       | 38            | 48°     | 73°     | 1550-2004                             |             |
|                      | 7        | LLE       | 20        | 84            | 48°     | 73°     | 1565-2004                             |             |
|                      | 8        | PAS       | 45        | 40            | 48°     | 73°     | 1752-2004                             | NA          |
|                      | 9        | BER       | 21        | 35            | 48°     | 73°     | 1851-2004                             |             |
|                      | 10       | CHU       | 48        | 79            | 48°     | 73°     | 1834-2002                             |             |
| <b>Bravo</b>         |          |           |           |               |         |         |                                       |             |
|                      | 11       | BRA       | 116       | 7             | 48°     | 72°     | 1612-2004                             |             |
|                      | 12       | ENR       | 14        | 135           | 48°     | 72°     | 1822-2004                             | NA          |
|                      | 13       | CIS       | 9         | 280           | 48°     | 72°     | 1915-2002                             |             |

\*No widespread fire year chronologies were developed for the Quetru-Pascua and Bravo watershed due to their lack of peaks in CHAR records.

**Table S2: Radiocarbon ages from the mallines Casanova (MCa), Tortel (MTo), and Leal (MLe). Calibrated ages determined with CALIB v6.0 and CALIBomb (Hua and Barbetti, 2004; Reimer et al., 2004).**

| Site number | Lab Code | Depth<br>(cm) | $^{14}\text{C}$ age (BP) $\pm$ | Cal BP (2 $\sigma$ )                                                                                   |
|-------------|----------|---------------|--------------------------------|--------------------------------------------------------------------------------------------------------|
| MTo         | 83166    | 10-11         | -115 $\pm$ 15                  | AD 1956(Mar) –<br>1957(Jun) (1.00)                                                                     |
| MTo         | 83167    | 37-38         | 890 $\pm$ 15                   | 740-800 (0.62)<br>810-830 (0.07)<br>865-900 (0.32)                                                     |
| MTo         | 83168    | 57-58         | 1395 $\pm$ 15                  | 1290-1330 (1.00)                                                                                       |
| MTo         | 83169    | 92-93         | 2855 $\pm$ 20                  | 2885-2910 (0.09)<br>2920-3040 (0.87)<br>3045-3060 (0.04)                                               |
| MLe         | 83170    | 15-16         | 155 $\pm$ 15                   | >Modern-0 (0.01)<br>5-30 (0.20)<br>85-110 (0.02)<br>140-150 (0.12)<br>170-220 (0.49)<br>255-280 (0.16) |
| MLe         | 83171    | 36-37         | 285 $\pm$ 20                   | 290-330 (0.42)<br>360-370 (0.02)<br>370-430 (0.56)                                                     |
| MLe         | 83172    | 58-59         | 1735 $\pm$ 15                  | 1570-1580 (0.03)<br>1600-1700 (0.97)                                                                   |
| MLe         | 83173    | 92-93         | 3190 $\pm$ 20                  | 3370-3450 (1.00)                                                                                       |
| MCa         | 83174    | 10-11         | -525 $\pm$ 15                  | AD 1957(Dec) –<br>1958(Aug) (1.00)                                                                     |

|     |       |         |         |                                                          |
|-----|-------|---------|---------|----------------------------------------------------------|
| MCa | 83175 | 37-38   | 745±15  | 665-690 (1.00)                                           |
| MCa | 83176 | 62-63   | 1410±20 | 1290-1340 (1.00)                                         |
| MCa | 83177 | 93-94   | 1785±20 | 1620-1670 (0.27)<br>1690-1740 (0.55)<br>1750-1810 (0.18) |
| MCa | 83178 | 143-144 | 3685±15 | 3975-4085 (1.00)                                         |
| MCa | 83179 | 242-243 | 6370±20 | 7255-7330 (0.92)<br>7355-7370 (0.03)<br>7390-7410 (0.05) |
| MCa | 83180 | 312-313 | 7165±25 | 7950-8020 (1.00)                                         |
| MCa | 83181 | 333-334 | 8780±20 | 9700-9900 (1.00)                                         |

---
